1 **Comparison of gene expression patterns of *Kappaphycus alvarezii* (Rhodophyta, Solieriaceae)**  
2 **under different light wavelengths and CO<sub>2</sub> enrichment**

3

4 Thien Vun Yee, Kenneth Francis Rodrigues, Clemente Michael Wong Vui Ling, Wilson Yong Thau

5 Lym

6

7 Biotechnology Research Institute, Universiti Malaysia Sabah, Jalan UMS, 88400 Kota Kinabalu,

8 Sabah Malaysia.

9

10 E-mail: kennethr@ums.edu.my

11

12

13 **Abstract**

14 Transcriptomes associated with the process of photosynthesis and carbon fixation have offered  
15 insights into the mechanism of gene regulation in terrestrial plants, however limited information is  
16 available as far as macroalgae are concerned. Intertidal red alga, *Kappaphycus alvarezii* is exposed to  
17 different wavelengths of light in their lives as light quantity and quality changes at different depths in  
18 seawater. This investigation aims to study the underlying mechanisms associated with photosynthesis  
19 and carbon fixation under specific light qualities and CO<sub>2</sub> enrichment. Light regulation of gene  
20 expression has not been previously described for red algae. By using next generation sequencing,  
21 transcriptome profiling of *K. alvarezii* generated 76,871 qualified transcripts with a mean length of  
22 979bp and a N50 length of 1,707bp and 55.83% transcripts were annotated on the basis of function.  
23 Blue, green and red light all have demonstrated roles in modulating light responses, such as changes  
24 in gene expression. Here we analysed the effects of light regulation on four selected photosynthesis  
25 aspects (light-harvesting complex, phycobilisomes, photosystems and photoreceptors). We observed  
26 that light-regulated gene expression in this species is not a single light response and different light  
27 qualities are transduced to regulate the same metabolic pattern. The carbon fixation pathway was  
28 analysed and key genes encoding enzymes involved in the carbon fixation pathway such as ppc, pepc,  
29 prk, pgk, ppdk, provided that unequivocal molecular evidence that most of the C<sub>3</sub> and C<sub>4</sub> pathway  
30 genes were actively transcribed in *K. alvarezii*. In addition to this the CO<sub>2</sub> induced transcriptome  
31 suggested the possibility of shifting carbon metabolism pathway after acclimation to increased level  
32 of CO<sub>2</sub>. Impact of CO<sub>2</sub> enrichment on the cultures has provided new insight into the response to  
33 rising CO<sub>2</sub>.

34

35 **Keywords:** carbon fixation, *Kappaphycus alvarezii*, transcriptome sequencing

36

## 37 **Introduction**

38 Transcriptome shifts associated by the light signals perceived by photoreceptors have offered insights  
39 into the gene regulation in higher plants, however limited information is available as far as  
40 macroalgae under light treatment are concerned. Red alga, *Kappaphycus alvarezii* grows in intertidal  
41 zone where they may face irradiance environments depleted in both light quantity and quality as the  
42 light spectral distribution changes at different depths in seawater. Intertidal seaweeds exposed to light  
43 spectrum which is similar as in air during low tide and blue light becomes predominant where the  
44 seaweeds grow under seawater of 2-5 m in depth at high tide (Dring, 1981). Seaweeds can acclimate  
45 to the changes of light quantity and qualities by employing efficient light-harvesting mechanisms,  
46 such as increase the quantity of photosynthetic pigments, change the ratio of accessory pigments to  
47 chlorophyll *a* (Lobban and Harrison, 1994). Red alga, *Chondrus crispus* have been reported to have  
48 increased phycoerythrin content and the efficiencies of photosynthesis increased with depth (Sagert *et*  
49 *al.*, 1997).

50  
51 Recently, insights in the light-mediated physiological responses and molecular mechanisms have  
52 been gained in brown alga, *Saccharina japonica* (Deng *et al.*, 2012; Wang *et al.*, 2013). Expression  
53 profiling of their researches indicate that light induces profound gene expression changes in *S.*  
54 *japonica*. These light responsive genes include many transcription factors and fall into various  
55 functional categories mainly involved in photomorphogenesis, circadian clock function,  
56 photoreactivation, photosynthetic carbon, metabolism and biosynthesis. Wang *et al.* (2013) suggested  
57 that promotion of metabolism and growth in kelps under blue light predominating environment was  
58 attributed to both reduction of red light and increase of blue light illumination. Thus, it suggested that  
59 different light qualities may play significant roles in the lives of red algae.

60  
61 The transcriptome of *K. alvarezii* was first sequenced by Wu *et al.* (2014) together with 19  
62 Phaeophyceae (brown algae) and other 20 Rhodophyceae (red algae), provide a broad range of algal  
63 transcriptome information that could contribute to algal genetic and biological study. Then, Song *et*

64 *al.* (2014) performed de novo transcriptome sequencing of *K. alvarezii* to investigate the mechanisms  
65 underlying the biosynthesis of carrageenan in Family Solieriaceae (*Betaphycus gelatinus*, *K. alvarezii*  
66 and *Eucheuma denticulatum*). They have identified 861 KEGG orthologs which might contain the  
67 main genes regulating the biosynthesis of carrageenan with different types and possessions. More  
68 recently, the transcriptome of *K. alvarezii* was profiled by Zhang *et al.* (2015). The results elucidate  
69 some genetic information and reveal many important metabolic pathways in *K. alvarezii*. For  
70 instance, the significantly enriched pathways include selenocompound metabolism (ko00450) and  
71 sulphur metabolism (ko00920) which were probably related to the alga's resistance to grazers and  
72 expelling of toxins (Lobanov *et al.*, 2007).

73  
74 No clear evidence for C<sub>3</sub> or C<sub>4</sub> photosynthetic pathways have been found in the *K. alvarezii*. The  
75 occurrence photosynthetic pathways in *K. alvarezii* are therefore still in question and await further  
76 research. Many studies reported that the operation of C<sub>3</sub> pathway is predominant in algae (Beer *et al.*,  
77 1986; Tsuji *et al.*, 2009); however, it has been demonstrated that C<sub>4</sub> photosynthesis is found in some  
78 eukaryotic algae (Derelle *et al.*, 2006; Leliaert *et al.*, 2012). The study of *Ulva prolifera* and *Chara*  
79 *contraria* on their primary photosynthetic carbon metabolism revealed that some algae possess both  
80 C<sub>3</sub> and C<sub>4</sub> pathways and may alter their carbon metabolism pursuant to the environment (Keeley,  
81 1999; Xu *et al.*, 2012). The alterations of photosynthetic pathways under environmental changes  
82 probably contributing to the adaptation of plants to environmental stress (Ehleringer *et al.*, 1997). A  
83 submerged aquatic plant, *Hydrilla verticillata*, was reported to change its photosynthetic pathways  
84 from C<sub>3</sub> to C<sub>4</sub> under conditions of CO<sub>2</sub> deficiency (Reiskind *et al.*, 1997).

85  
86 In this study, we used next generation sequencing technology to profile the transcriptome of red alga,  
87 *K. alvarezii*, with the aim to characterise its functional genome under specific light qualities and CO<sub>2</sub>  
88 enrichment. This investigation will enhance our understanding of molecular mechanisms underlying  
89 light-induced responses in lower plants as well as facilitate our understanding in inorganic carbon  
90 fixation in red algae. In addition, this study would improve our understanding of the impact of

91 changing light conditions on *K. alvarezii* and the potential mechanism of light adaptation of this red  
92 alga.

93

#### 94 **Materials and methods**

95 Seaweed materials and culture conditions

96 Seedlings of *Kappaphycus alvarezii* (var. *tambalang* ‘giant’) were obtained from Biotechnology  
97 Research Institute (BRI), Universiti Malaysia Sabah. The seaweed was originally collected from  
98 Pulau Sebangkat (4°33′ 31″N, 118°39′49″E), Semporna, Sabah. The young seedlings were cultured  
99 under laboratory conditions (Yong *et al.* 2014). The experimental samples were selected from healthy  
100 and disease-free explants. Three replicates consisted of five algal tips were cut to a total length of 2  
101 cm and used for each experimental condition. The algal tips were cultured in the Fernbach culture  
102 vessel with 800 mL artificial seawater (Fluval marine salt, 36 g L<sup>-1</sup>, salinity 31.4 ppt) enriched with  
103 50 % Provasoli's enriched seawater (PES) media. For light treatment, the cultures grown under 75  
104  $\mu\text{mol photons m}^{-2} \text{ s}^{-1}$  white light (WL), blue light (BL) (wavelength = 492-455 nm), green light (GL)  
105 (wavelength = 577-492 nm) and red light (RL) (wavelength = 780-622 nm), respectively. Cultures  
106 were carried out at 25±1.0°C with 18 h light and 6 h dark cycle. Light-emitting diodes (LEDs) were  
107 used as light sources. Detected irradiances were measured with a digital light meter (Kyoritsu, Japan).  
108 For CO<sub>2</sub> treatment, the cultures were illuminated by white LED, providing an irradiance of 75  $\mu\text{mol}$   
109  $\text{photons m}^{-2} \text{ s}^{-1}$ , on a 18 h light and 6 h dark cycle. CO<sub>2</sub> was provided 500 mL per day and controlled  
110 by supplying chambers with air/CO<sub>2</sub> mix. Provision of 500 mL of CO<sub>2</sub> per day was proved to achieve  
111 the highest growth rate of *K. alvarezii* (Barat, 2011). To avoid overly acidifying cultures,  
112 supplemental CO<sub>2</sub> was only supplied during photoperiod. Temperature was maintained at 25±1.0°C.  
113 The cultures from both treatments were collected for RNA extraction after 14 days experimental  
114 period.

115

116

117

118 RNA isolation and preparation of cDNA library

119 Total RNA was extracted using QIAGEN RNeasy Plant Mini Kit (QIAGEN, Germany) according to  
120 manufacturer's protocol. The experimental samples were wash with DEPC-treated water and then  
121 quickly frozen with liquid nitrogen and ground to a fine powder using RNase-free, chilled mortar and  
122 pestle. Typically, RNA samples with an A260/A280 ratio between 1.8 – 2.0 and A260/A230 ratio  
123 between 1.8 – 2.1 and RIN number of 8 and above were recommended to be sufficiently pure for  
124 further library construction.

125

126 Five cDNA libraries were generated with messenger RNA (mRNA) isolation and cDNA synthesis  
127 from five RNA samples were performed using NEBNext Ultra RNA Library Prep Kit for Illumina  
128 according to manufacturer's protocol. In brief, the mRNA was purified from total RNA using poly-T  
129 oligo-attached magnetic beads and sheared into short segments of about 200 bp. Using the cleaved  
130 short RNA fragments as templates, first strand cDNAs were synthesised by random hexamer-primers  
131 and reverse transcriptase. The second strand cDNA was synthesised using DNA polymerase I and  
132 RNase H. The purified double strand cDNAs were subjected to end repair and NEBNext adaptor  
133 ligation. The resulting libraries were then loaded onto a single lane of the flow cell, and 209 cycles on  
134 the Illumina HiSeq 2000 platform (Illumina, USA) performed by Malaysian Genomics Resource  
135 Centre (MGRC). The high quality reads were deposited at the NCBI Short Read Archive (SRA) with  
136 the accession number: SRR2757332 (Green), SRR2757333 (Blue), SRR2757334 (CO<sub>2</sub>),  
137 SRR2757335 (White) and SRR2757337 (Red).

138

139 Quality control and de novo transcriptome assembly

140 Sequencing reads from the Illumina sequencer were exported in FASTQ format with the  
141 corresponding Phred quality scores. First, the quality of the sequencing raw reads was evaluated with  
142 FastQC v0.11.2 ([www.bioinformatics.babraham.ac.uk/projects/fastqc](http://www.bioinformatics.babraham.ac.uk/projects/fastqc)). Strict reads filtering was  
143 performed before assembly: (i) removing sequencing adaptor sequences; (ii) filtering the reads

144 containing unknown nucleotides (Ns); (iii) removing the reads with more than 10% bases below Q20  
145 sequencing quality.

146

147 The obtained clean reads were subjected to transcriptome de novo assembly using Trinity (Grabherr  
148 *et al.*, 2011). Briefly, Inchworm first assembles reads by searching for paths in a 25 bp K-mer graph,  
149 resulting in a collection of linear contigs. Next, Chrysalis clusters the reads with certain length of  
150 overlap and constructs a De Bruijn graph for each cluster. Finally Butterfly reconstructs plausible  
151 full-length, linear transcripts by reconciling the individual de Bruijn graphs generated by Chrysalis.  
152 After generating final assembly, TGIR Gene Indices clustering tools (TGICL) software (Perteau *et al.*,  
153 2003) was used to remove redundant sequences.

154

155 Transcriptome analysis

156 The assembled sequences were blastx searched against the UniProt protein databases (The UniProt  
157 Consortium, 2015) and Kyoto Encyclopaedia of Genes and Genomes (KEGG) database (Kanehisa *et al.*,  
158 2008) with  $10^{-5}$  *E*-value cutoff. The sequences were then functionally clustered using Blast2GO  
159 (Conesa *et al.*, 2005) to get GO annotation and further classification by WEGO (Ye *et al.*, 2006) for  
160 all assembled sequences.

161

162 Identification of differentially expressed genes (DEGs)

163 RSEM was used to estimate transcripts abundance (Li and Dewey, 2011) and differential expression  
164 between two groups was determined by software edgeR (Robinson *et al.*, 2010). In order to analysing  
165 differential expression, the transcripts with adjusted *p*-value < 1e-3 and log<sub>2</sub> fold change of two were  
166 extracted and clustered according to their patterns of differential expression across the sample. All  
167 the DEGs were mapped to the terms in KEGG database and searched for significantly enriched  
168 KEGG pathways compared to the whole transcriptome background.

169

170 Quantitative real-time PCR analysis

171 Total RNA was extracted with QIAGEN RNeasy Plant Mini Kit (QIAGEN, Germany). The cDNA  
172 synthesis was carried out with QuantiTect Reverse Transcription kit (QIAGEN, Germany). The 18S  
173 rDNA gene (U25437) was chosen as internal control for normalisation of real-time PCR data.  
174 Primers for amplification of targeted genes (Supplementary Table S1) and 18S rDNA gene were  
175 designed using Primer3 software (<http://frodo.wi.mit.edu/primer3/>) aiming for an amplicon length of  
176 80 – 200 bp, a GC content of 40-60%, a primer length of 18 – 30 bp and a primer melting  
177 temperature of 60 – 65°C. Primers were assessed for melting temperature, hairpins and primer dimers  
178 using the web-based tool Beacon Designer (<http://free.premierbiosoft.com>). The real-time  
179 quantitative PCR was performed with QuantiNova SYBR green master mix (QIAGEN, Germany) on  
180 the Eco Real-Time PCR System (Illumina). Real-time PCR was performed in volume of 20 µL, and  
181 cycling conditions were 95°C for 2 min; 40 cycles of 95°C for 5 s and 60°C for 10 s. The PCR  
182 reactions were repeated in triplicates together with negative control and data were analysed using the  
183  $2^{-\Delta\Delta CT}$  method.

184

## 185 **Results**

186 Transcriptome sequencing and de novo assembly

187 The sequencing run generated a total of 31.89 Gb raw paired-end reads. After trimming adapters and  
188 filtering out low quality reads, over 25 Gb clean reads (~79%) were retained for assembly and further  
189 analysis. We generated 76,871 assembled transcripts by Trinity, which have lengths ranging from  
190 300 to 17,257 bp (Fig. 1) and an N50 of 1,707 bp (Table 1). There were no ambiguous bases within  
191 the assembled sequences. A large number of the reads (93.51%) aligned back to the transcripts and  
192 average read depth of 256.47. The reads that did not map back to the assembled transcripts  
193 corresponded to either shorter than 300 bp or failed to match with any clean read.

194



195

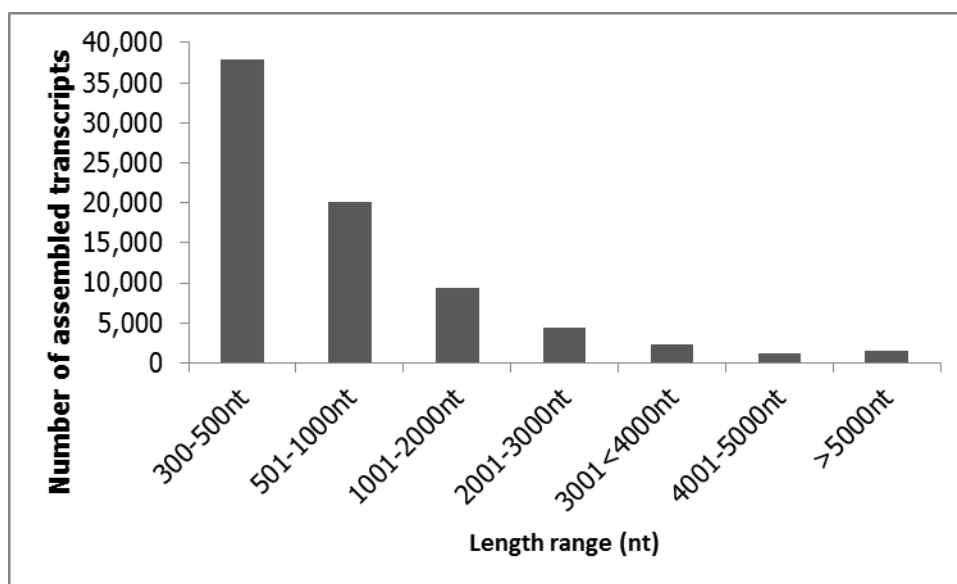

196

197 Figure 1: Graphical length distribution summary of transcripts identified in transcriptome data.

198

199 Table 1: Assembly results of *K. alvarezii* transcriptome generated from Trinity.

|                                | Trinity    |
|--------------------------------|------------|
| Total transcripts              | 76871      |
| total length (bp)              | 75,239,915 |
| Mean length (bp)               | 979        |
| N50 length (bp)                | 1,707      |
| The shortest transcripts (bp)  | 300        |
| The longest transcripts (bp)   | 17,257     |
| Transcripts $\geq$ 500 bp (%)  | 50.63%     |
| Transcripts $\geq$ 1000 bp (%) | 24.44%     |
| GC (%)                         | 51.17      |
| Annotation rate (%)            | 55.83      |

200

201

202

203 **Functional annotation of *K. alvarezii* transcriptome**

204 Blastx was used to map assembled transcripts against the protein databases UniProt, KEGG and COG  
 205 with a cutoff *E*-value of  $10^{-5}$ . The top hit from each of these assembled transcripts comparisons was  
 206 used as the annotation reference for the respective transcripts. To sum up, 42,915 transcripts were  
 207 assigned to putative functions, accounting 55.83% of the total assembled sequences (Supplementary  
 208 Table S2). With UniProt annotation, 23,701 sequences had perfect matches with *E*-value  $<10^{-45}$  and  
 209 21.42% of the matches had similarity over 95% (Fig. 2a, b). The species distribution showed that  
 210 only 13.45% had top matches to *Chondrus crispus* and next top matching species was  
 211 *Phaeodactylum tricornutum*, accounting for 3.61% (Fig. 2c).

212  
 213

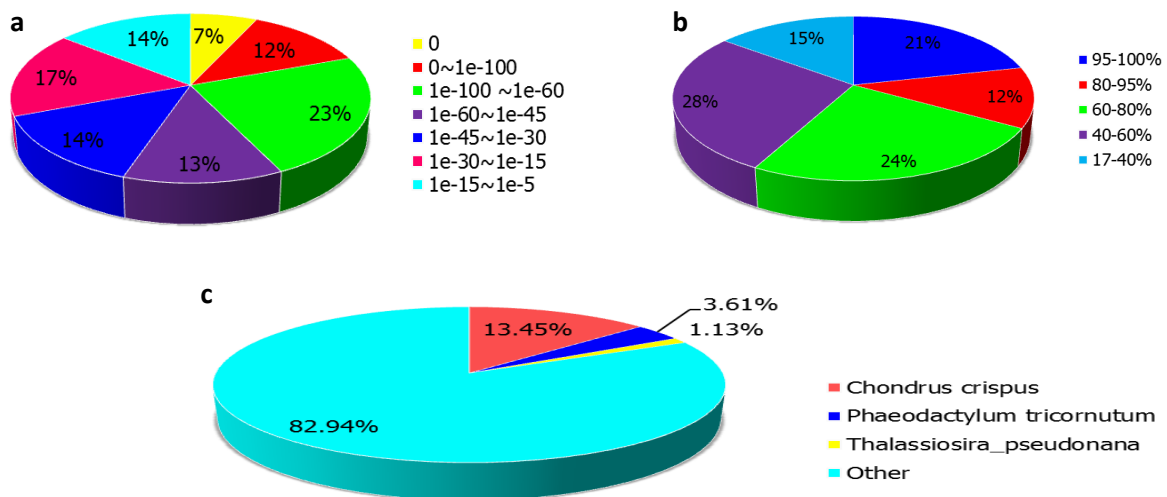

214

215

216

217 Figure 2: Characteristics of similarity search of the assembled sequences against the Uniprot  
 218 databases. **a** E value distribution of blast hits for each unique sequence with E value  $\leq 10^{-5}$ . **b**  
 219 Similarity distribution of the top blast hits for each sequence. **c** Species distribution of the total  
 220 homologous sequences with E value  $\leq 10^{-5}$ . The first hit of each sequence was used for statistics.

221

222

223 There were 45 transcripts encoding light harvesting proteins and 72 gene tags belonging to  
224 photosynthetic pigments including chlorophyll, carotenoids (beta- and zeta-carotene), phycobilisome,  
225 phycocyanin and phycoerythrin. Three types photoreceptors were identified including one  
226 cryptochrome, two blue-light receptor (PHR2) and four phytochrome protein. One phytochrome  
227 protein had significant homology to the phytochrome-like protein 2, a photoreceptor which exists in  
228 two forms that are reversibly interconvertible by light (Kaneko *et al.*, 1995). In addition, a total of 38  
229 gene tags belonging to photosystem proteins (I and II). The main subunits of PS I, PsaA, PsaB and  
230 PsaC, PS I chlorophyll A apoprotein, the Ycf3 and Ycf4 protein domain are identified. Out of 38  
231 photosystem proteins, 23 of them are photosystem II proteins including D1, D2, CP43, CP47, PsbP,  
232 PS II reaction center protein M). There were 307 gene tags belonging to protein kinase (PK) family,  
233 including serine/threonine PK, calcium-dependent PK and receptor-like PK. A total of 59.93% PKs  
234 in *K. alvarezii* were highly homologous to those in *Chondrus crispus*.

235  
236 To facilitate the organization of the *K. alvarezii* transcripts into putative functional groups, Gene  
237 Ontology (GO) terms were assigned using WEGO software. A total of 28,079 annotated transcripts  
238 were further categorized to the three main GO domains: biological processes, cellular components  
239 and molecular function, including 20,847 sequences at term “biological process”, 14,291 sequences  
240 at term “cellular component” and 41,698 sequences at term “molecular function” (Supplementary Fig.  
241 S3).

242  
243 Functional and pathway analysis of the transcripts of *K. alvarezii* were carried out using the KEGG  
244 pathway database (Kanehisa *et al.*, 2004). A total of 10,460 transcripts had assigned to 278 KEGG  
245 pathways (Table 2). Category “metabolic pathways” had the largest numbers of transcripts among all  
246 the categories, followed by the categories of “biosynthesis of secondary metabolites”, “biosynthesis  
247 of amino acids” and “carbon metabolism”.

248

249

250 Table 2: The top 10 pathways identified in the *Kappaphycus* transcriptome.

| Pathway                               | Number of transcripts | Pathway ID |
|---------------------------------------|-----------------------|------------|
| Metabolic pathways                    | 814                   | ko01100    |
| Biosynthesis of secondary metabolites | 337                   | ko01110    |
| Biosynthesis of amino acids           | 131                   | ko01230    |
| Carbon metabolism                     | 117                   | ko01200    |
| Ribosome                              | 111                   | ko03010    |
| Purine metabolism                     | 95                    | ko00230    |
| Oxidative phosphorylation             | 94                    | ko00190    |
| Pyrimidine metabolism                 | 73                    | ko00240    |
| RNA transport                         | 70                    | ko03013    |
| Spliceosome                           | 65                    | ko03040    |

251

252

253 Both C3 and C4 photosynthesis genes were found in *K. alvarezii* by transcriptome sequencing. In  
254 total, 97 transcripts assigned to all the essential enzymes in both C3 and C4 carbon fixations were  
255 identified (Supplementary Table S4). Some key genes of enzymes involved in the carbon fixation  
256 pathway in *K. alvarezii* were discovered, such as aspartate aminotransferase (ast),  
257 phosphoribulokinase (prk), pyruvate orthophosphate dikinase (ppdk), phosphoglycerate kinase (pgk),  
258 malate dehydrogenase (mdh), phosphoenolpyruvate carboxylase (ppc) and phosphoenolpyruvate  
259 carboxykinase (pck), which provided unequivocal molecular evidence that most of the C<sub>3</sub> and C<sub>4</sub>  
260 pathway genes were actively transcribed in *K. alvarezii*.

261

262 Identification of DEGs

263 The high quality reads from individual samples were mapped to the transcriptome database with the  
264 mapping percentage ranged from 84 to 86% (Table 3). The lower mapping rate reflects the low  
265 transcriptome sequencing depth and the high heterozygosity found in *K. alvarezii*.

266

267 Table 3: Paired-end read mapping statistics of transcripts identified in transcriptome data.

| Sample                                    | WL         | BL         | GL         | RL         | C02E*      |
|-------------------------------------------|------------|------------|------------|------------|------------|
| Total reads pair                          | 30,115,700 | 22,796,939 | 27,106,635 | 23,380,754 | 24,122,534 |
| Total mapped<br>reads pair                | 25,435,206 | 19,493,673 | 23,083,936 | 19,978,487 | 20,784,761 |
| Percentage of<br>mapped reads<br>pair (%) | 84.46      | 85.51      | 85.16      | 85.45      | 86.16      |

268 \*CO2E indicated CO<sub>2</sub> enriched cultures.

269

270 The read normalisation was performed using TMM methods (Robinson and Oshlack, 2011) which  
271 implemented in the edgeR Bioconductor package. Setting FDR  $\leq 10^{-3}$  and log<sub>2</sub> fold change of two as  
272 the cutoff, 11,769 DEGs were obtained (Supplementary Table S5). The results were validated by  
273 qPCR (data not shown), confirming the accuracy of RNA-Seq in mRNA quantification. A total of  
274 7,962 DEGs (67.65%) were successfully annotated through the sequence similarity searching against  
275 the UniProt databases with a significance of E-value  $\leq 10^{-5}$ .

276

277 The most DEGs were found to be down-regulated between every two samples. For the light treatment,  
278 the most DEGs were detected between GL and WL, with 390 DEGs upregulated and 908 DEGs  
279 downregulated (Supplementary Fig. S5). If mRNA abundance of a gene was similar between BL, GL  
280 and WL while higher than RL, the DEG was interpreted to be RL-downregulated. If the expression  
281 level of a gene was higher or lower under WL than under both BL, GL and RL, the DEG was  
282 suggested to be either BL-, GL- or RL-regulated. Based on the gene expression patterns among the  
283 four lights (Table 4), a total of 5,967 DEGs were designated to four categories: BL-regulated,  
284 GL-regulated, RL-regulated and either BL- or GL- or RL-regulated (Supplementary Fig. S5). For  
285 CO<sub>2</sub> enrichment experiment, a total of 54,938 transcripts were differentially expressed between WL

286 and CO<sub>2</sub> enrichment. Based on adjusted  $p$ -value  $<10^{-3}$  and log<sub>2</sub> fold change of two, 2,519 DEGs were  
287 identified, including 1,125 upregulated and 1,394 downregulated transcripts (Supplementary Fig. S5).  
288

289 Table 4: Number of transcripts significantly differentially expressed in the four samples.

| Condition 1 | Condition 2 | Up-regulated | Down-regulated | Total | Category                             |
|-------------|-------------|--------------|----------------|-------|--------------------------------------|
| BL          | GL+RL+WL    | 498          | 54             | 552   | BL-regulated                         |
| GL          | BL+RL+WL    | 320          | 1,656          | 1,976 | GL-regulated                         |
| RL          | BL+GL+WL    | 601          | 177            | 778   | RL-regulated                         |
| WL          | BL+GL+RL    | 127          | 2,534          | 2,661 | Either BL- or GL- or<br>RL-regulated |

290  
291 To better understand the functions of DEGs, all the DEGs were mapped to the terms in KEGG  
292 database and compared with whole transcriptome background to search for genes involved in  
293 significantly pathways. Pathway enrichment analysis revealed that the annotated DEGs were mainly  
294 involved in ‘metabolic pathways’, ‘biosynthesis of secondary metabolites’, ‘oxidative  
295 phosphorylation’, ‘carbon metabolism’ and ‘porphyrin and chlorophyll metabolism’. The annotation  
296 shed light on the regulatory functions of light qualities on the specific processes, functions and  
297 pathways in *K. alvarezii*.

298

## 299 Discussion

300 Intertidal seaweeds are subjected to rapidly changing environmental conditions. As a result, they  
301 have developed mechanisms that help them to cope with unfavourable disturbances or environmental  
302 stresses. These adaptation and acclimation responses contribute significantly to their survival and  
303 fitness, providing them with the plasticity necessary for a stationary life. This investigation highlights  
304 the understanding of gene expressions and responses of red alga *K. alvarezii* towards their light  
305 environment (BL, GL, RL and WL) and increasing CO<sub>2</sub> level.

306

307    Photosynthesis begins with light absorbing, thus light harvesting is the first step in the photosynthetic  
308    process which mediated by pigment-binding proteins forming light-harvesting antenna systems.  
309    Light-harvesting complex (LHC) proteins constitute a large family of proteins, which includes  
310    chlorophyll *a/b*-binding proteins, fucoxanthin chlorophyll *a/c*-binding proteins, high light-induced  
311    proteins and early light-induced proteins (Green and Kuhlbrandt, 1995; Caron *et al.*, 2001).  
312    Chlorophyll *a/b*-binding and fucoxanthin chlorophyll *a/c*-binding proteins were frequently reported  
313    to be transcriptionally repressed in response to light stress (Tonkyn *et al.*, 1992; Maxwell *et al.*, 1995;  
314    Teramoto *et al.*, 2002). In this study, the amount of genes encoding light-harvesting proteins  
315    transcripts were significantly downregulated under different light qualities (BL, GL and RL)  
316    (Supplementary S5) and no significance difference between control and CO<sub>2</sub> enrichment.  
317    Fucoxanthin chlorophyll *a/c*-binding and early light-induced proteins were upregulated under GL.  
318    Meanwhile, similar responses of *K. alvarezii* were found under BL and RL that both fucoxanthin  
319    chlorophyll *a/c*-binding and high light-induced proteins were downregulated. Recent transcriptomic  
320    studies of stress responses highlighted fucoxanthin chlorophyll *a/c*-binding proteins were upregulated  
321    in responses to heat-, salt-, oxidative-, or light stress in both brown algae (Hwang *et al.*, 2008;  
322    Dittami *et al.*, 2009; Pearson *et al.*, 2010). Similar observations were made concerning chlorophyll  
323    *a/b*-binding and fucoxanthin chlorophyll *a/c* -binding proteins in *Chlamydomonas reinhardtii* after  
324    high light treatment (Savard *et al.*, 1996; Miura *et al.*, 2004). It is reported that there is possible  
325    additional functions of these proteins. For example, fucoxanthin chlorophyll *a/c*-binding proteins  
326    were observed to be downregulated in a developmental mutant of the brown alga *Ectocarpus*  
327    *siliculosus* (Peters *et al.*, 2008). The recently discovered “red lineage chlorophyll *a/b*-binding-like  
328    proteins” (RedCAPs) by Sturm *et al.* (2013) which was found to be restricted to the red algal lineage,  
329    reported to participate in the light (intensity- and quality-) dependent structural remodelling of  
330    light-harvesting antennae in the red lineage. However, the existence and expression of RedCAPs in  
331    response to different light qualities and CO<sub>2</sub> level in *K. alvarezii* remains unknown.  
332

333 Chlorophyll and carotenoids in red algae is not that of a primary light absorber, this role is taken over  
334 by the phycobilisomes. Phycobilisome functions as primary light absorber in red algae and funnel the  
335 energy to the reaction center of PS II for conversion into chemical forms (Gantt *et al.*, 2003). This  
336 complex contains two or three types of pigment-proteins known as biliproteins: phycoerythrin,  
337 phycocyanin and allophycocyanin. They differ in protein identity, chromophore type and attachment  
338 and their relative location in the phycobilisome complex (Blankenship, 2002). The phycobilisome  
339 absorbs light across the between 590-650 nm region of the solar spectrum that neither chlorophyll nor  
340 carotenoids are capable of absorbing light. Thus, organisms with phycobilisomes have greater  
341 accessibility to usable light within the visible spectrum and hence greater adaptability and light  
342 capturing capacity (Blankenship, 2002). Although RL had the significant impact on the growth rate  
343 of *K. alvarezii* as compared to those treated with BL and GL, however, the phycobilisomes showed  
344 no significant different expressions among the four light qualities. Different light spectral seemed to  
345 induce the same effect on phycobilisome contents in *K. alvarezii*. In contrast, many experiments  
346 (Figueroa and Niell 1990; Talarico and Cortese, 1993; Franklin *et al.*, 2002; Godinez-Ortega *et al.*,  
347 2008) observed that the synthesis of chlorophyll, phycoerythrin, phycocyanin in the red algae have  
348 been shown to be influence by both irradiance and spectral composition. Such changes do not always  
349 imply statistical significance in differential expression analysis in transcriptome data as the  
350 differential analysis takes into account of overall depth of sequencing, read and fragment length, gene  
351 density in the genome, transcriptome splicing complexity and transcript abundance that could be vary  
352 for each sample (Trapnell *et al.*, 2012). On the other hand, three DEGs tag to phycobilisome were  
353 identified between control and cultures treated with CO<sub>2</sub> enrichment. Phycobilisome and  
354 phycoerythrin were upregulated while phycocyanin was downregulated under CO<sub>2</sub> enrichment. The  
355 upregulation of photosystem proteins and phycobilisomes suggested that photosynthesis efficiency of  
356 *K. alvarezii* was enhanced by raising CO<sub>2</sub> level.

357

358 The presence study has identified 38 gene tags of photosystems proteins (15 PS I and 23 PS II).

359 Photosystems are functional and structural units of protein complexes involved in photosynthesis.



360 The photosystem proteins showed no significant different expressions among the four light qualities.  
361 The most had the highest mRNA levels under RL (33) and the lowest under BL (18). It can be said  
362 that RL is more efficient than BL, GL and WL in term of photosynthetic efficiency in *K. alvarezii*.  
363 Meanwhile, out of 38 transcripts of photosystem proteins, 9 genes encoding of photosystem proteins  
364 were upregulated by raising CO<sub>2</sub> concentrations, including 4 PS I proteins (ycf4, subunit III, reaction  
365 center subunit XI and chlorophyll A apoprotein) and 5 PS II proteins (D1, CP43 and CP47). These  
366 findings exhibited the importance of CO<sub>2</sub> enhancing the quantum efficiency of photosystem I and II.  
367 Interaction between elevated CO<sub>2</sub> levels and responses of seaweeds are still largely unknown. The  
368 contradictory results were obtained on growth and photosynthetic rates under CO<sub>2</sub> enrichment (Gao  
369 *et al.*, 1991, 1993; Garcia-Sanchez *et al.*, 1994; Israel and Hophy, 2002; Zou, 2005). It is suggested  
370 that the functional PS II is increased under CO<sub>2</sub> enrichment, therefore, in order to balance the  
371 stoichiometry of PS I and PS II, genes encoding subunits of PS I are simultaneously highly expressed  
372 to increase amount of PS I, improving the tolerance of plant to high CO<sub>2</sub> levels.  
373  
374 Light-regulated gene expression mediated by photoreceptors has been study in plants, including algae  
375 (Ma *et al.*, 2001; Jiao *et al.*, 2005; see review Kianianmomeni and Hallman, 2014). We have  
376 identified two types of photoreceptors in *K. alvarezii*: phytochromes and cryptochromes.  
377 Phytochromes are red/far-red photoreceptors, measure the changes in light quality in the red and  
378 far-red regions of the visible spectrum, allowing plants to assess the quantity of photosynthetically  
379 active light (Franklin and Whitelam, 2005); cryptochromes are flavoproteins, function as blue light  
380 receptors that share sequence similarity to DNA photolyases, DNA enzymes that use blue light to  
381 repair UV-induced (Sancar, 2003). In the present study, phytochrome-like protein and cryptochrome  
382 transcripts were observed expressed under WL. The phytochrome gene is not expressed under BL,  
383 GL and RL. Thus we suggest that the expression of phytochrome genes in *K. alvarezii* seems to be  
384 triggered by others light qualities. In *Arabidopsis thaliana*, the expression of all photoreceptors genes  
385 has been demonstrated to be regulated by light or circadian clock (Reka, 2003). Similarly in brown  
386 alga *Saccharina japonica*, expression of photoreceptor genes seems to be triggered by all light

387 qualities (BL, RL and WL) (Wang *et al.*, 2013). In contrast, no phytochrome genes could be  
388 identified in the genomes of green alga *Volvox carteri* and *Chlamydomonas reinhardtii*, even though  
389 red- and far-red-regulated gene expression has been observed in these algae (Alizadeh and Cohen,  
390 2010; Beel *et al.*, 2012). The absence of phytochromes might indicate that other phytochrome  
391 photoreceptors such as animal-like cryptochromes, which absorb both blue and red light (Beel *et al.*,  
392 2012). On the other hand, the expression of cryptochrome genes was highly expressed in all light  
393 qualities and CO<sub>2</sub> enrichment except under RL. Danon *et al.* (2006) and Lopez *et al.* (2011) reported  
394 that cryptochrome in plants are involved in the light-dependent gene expression, the light dependence  
395 mainly affect genes involved in the response to biotic/abiotic stress and regulation of photosynthesis.  
396 The presence of cryptochrome under GL is not surprising as cryptochromes are able to process GL,  
397 however, less effectively compared to BL (Folta and Maruhnich, 2007).

398

399 All the genes necessary to encode the enzyme involved in photosynthetic inorganic carbon fixation  
400 were identified (Supplementary Table S4). The data allow the identification of all enzymes necessary  
401 for the reductive pentose phosphate cycle, glyceraldehyde-3P => ribulose-5P (C<sub>3</sub>) and the  
402 C<sub>4</sub>-dicarboxylic acid cycle, phosphoenolpyruvate carboxykinase type (PCK) carbon fixation pathway,  
403 indicated the possibility of the existence of two photosynthetic pathways (C<sub>3</sub> and C<sub>4</sub>) in *K. alvarezii*.  
404 Some experimental results suggest that the PCK-type is maximal in biomass production and CO<sub>2</sub>  
405 fixation (Fravolini *et al.*, 2002; Wang *et al.*, 2012). Recent papers have reported the evidence for the  
406 operation of C<sub>4</sub> photosynthesis as an alternative inorganic carbon-concentrating mechanism (CCM)  
407 in marine organisms (Tachibana *et al.*, 2011). The expression levels of C<sub>4</sub> enzymes, such as mdh, ast,  
408 ppc, pck and ppdk were higher than C<sub>3</sub> enzymes, indicate C<sub>4</sub> photosynthesis may function under  
409 atmospheric CO<sub>2</sub> level. Most of the key enzymes of C<sub>3</sub> such as glyceraldehyde 3-phosphate  
410 dehydrogenase (gapdh), pgk, and fructose-bisphosphate aldolase (fba) were expressed higher under  
411 CO<sub>2</sub> enrichment (Supplementary Table S6), however the difference is not significant. These results  
412 suggested CO<sub>2</sub> enhancement may alter carbon metabolism and lead to C<sub>3</sub>-type carbon metabolism in  
413 *K. alvarezii*. As CO<sub>2</sub> level increase, the stomata plants increasingly close up and thus reduce the

414 amount of water lost. In other words, plants significantly improve the water use efficiency as less  
415 water is transpired. Increase in the level of CO<sub>2</sub>, C<sub>4</sub> plants show drastically reduced rates of  
416 photorespiration because CO<sub>2</sub> is concentrated at the carboxylation site (RuBisCo) and is able to out  
417 compete molecular oxygen (Weber and von Caemmerer, 2010). The elimination of oxygenation  
418 reaction to a great extent and the loss of energy connected with the photorespiratory pathway is  
419 largely decreased (Heldt and Piechulla, 2011). For these reasons, the photosynthetic efficiency gap  
420 between C<sub>3</sub> and C<sub>4</sub> rapidly closes. As competing for the resources (water, nutrients and light) on the  
421 same patch, C<sub>3</sub> is increasing outcompete the C<sub>4</sub> metabolism. However, current understanding of the  
422 underlying mechanisms of the response of red algae to elevated CO<sub>2</sub> concentrations is largely  
423 unknown; the demand of response of red algae to increasing CO<sub>2</sub> warrants further research.

424

## 425 **Conclusion**

426 To summarise, a total of 76,871 sequences were assembled using Trinity and 42,915 transcripts were  
427 assigned to functional annotation. 55.83% of transcripts were annotated through UniProt, provided  
428 important clues to the functions of many unknown sequences that could not be annotated using  
429 sequence comparison. Differential expression analysis revealed that only a small portion of genes  
430 (15.31%) were significantly expressed. The most DEGs were found under CO<sub>2</sub> enrichment. Three  
431 different wavelengths were used: BL, GL and RL and compared to full spectrum (WL), similar gene  
432 expression patterns were found in term of photosynthesis aspect. The data presented suggesting  
433 light-regulated gene expression in *K. alvarezii* is not a single light response. On the other hand, CO<sub>2</sub>  
434 enrichment leads to changes of photosynthetic pathway from C<sub>4</sub> to C<sub>3</sub> may contribute to the  
435 adaptation of this species to global CO<sub>2</sub> changes. The alteration of photosynthetic pathways under  
436 CO<sub>2</sub> enrichment highlights new questions to be addressed in subsequent work. This transcriptome  
437 study resulted in a number of new insights regarding the regulation of genes respond to different  
438 wavelengths of light and addition of CO<sub>2</sub>.

439

440

441 **Acknowledgements**

442 The authors would like to thank the Ministry of Higher Education for granting a Fundamental  
443 Research Grant Scheme (FRGS) entitled “**Transcriptomic and carrageenan analyses of**  
444 **micropropagated *Kappaphycus* and *Eucheuma* seaweeds under different light regimes and**  
445 **carbon dioxide concentrations**”.

446

447 **References**

448 Blankenship, R.E. 2002. Molecular mechanisms of photosynthesis. Blackwell Science, Oxford.

449

450 Heldt, H.W., Piechulla, B. 2011. Plant biochemistry. Academic Press, Elsevier.

451

452 Barat, W. O. B. (2011). Utilization of carbon dioxide for the optimization of the growth of seaweed  
453 *kappaphycus alvarezii*. UT-Aquatic product technology.

454 <http://repository.ipb.ac.id/handle/123456789/52986>

455

456 Conesa, A., Gotz, S., Garcia-Gomez, J.M., Terol, J., Talon, M., Robles, M. 2005. Blast2GO: a  
457 universal tool for annotation, visualisation and analysis in functional genomics research.  
458 *Bioinformatics* **21**: 3674-3676.

459

460 Weber, A.P.M., von Caemmerer, S. 2010. Plastid transport and metabolism of C3 and C4 plants –  
461 comparative analysis and possible biotechnological exploitation. *Current Opinion Plant Biology*  
462 **13**:257-265.

463

464 Franklin, K.A., Whitelam, G.C. 2005. Phytochromes and shade-avoidance responses in plants.  
465 *Annals of Botany* **96**:169-175.

466 Folta, K.M., Maruhnich, S.A. 2007. Green light: a signal to slow down or stop. *Journal of*

467 *Experimental Botany* **58**:3099-3111.

468

469 Lopez L, Carbone F, Bianco L, Giuliano G, Facella P, Perrotta G (2011) Tomato plants  
470 overexpressing cryptochrome 2 reveals altered expression of energy and stress related gene products  
471 in response to diurnal cues. *Plant, Cell Environ* 35:994–1012

472

473 Danon A, Coll NS, Apel K (2006) Cryptochrome-1-dependent execution of programmed cell death  
474 induced by singlet oxygen in *Arabidopsis thaliana*. *Proc Natl Acad Sci USA* 103:17036–17041

475

476 Sancar A. Structure and function of DNA photolyase and cryptochrome blue-light  
477 photoreceptors. *Chem Rev.* 2003;103:2203–2237. doi: 10.1021/cr0204348.

478

479 Ma, L., Li, J., Qu, L., Hager, J., Chen, Z., Zhao, H., Deng, X.W. 2001. Light control of Arabidopsis  
480 development entails coordinated regulation of genome expression and cellular pathway. *Plant Cell*  
481 13:2589-2608.

482

483 Jiao, Y., Ma, L., Strickland, E., Deng, X.W. 2005. Conservation and divergence of light-regulated  
484 genome expression patterns during seedling development in rice and Arabidopsis. *Plant Cell*  
485 17:3239-3256.

486

487 Kianianmomeni, A., Hallman, A. 2014. Algal photoreceptors: in vivo functions and potential  
488 applications. *Planta* 239:1-26.

489

490 Alizadeh D, Cohen A (2010) Red light and calmodulin regulate the expression of the *psbA* binding  
491 protein genes in *Chlamydomonas reinhardtii*. *Plant Cell Physiol* 51:312–322

492

493 Beel B, Prager K, Spexard M, Sasso S, Weiss D, Müller N, Heinnickel M, Dewez D, Ikoma D,  
494 Grossman AR, Kottke T, Mittag M (2012) A flavin binding cryptochrome photoreceptor responds to  
495 both blue and red light in *Chlamydomonas reinhardtii*. *Plant Cell* 24:2992–3008  
496  
497 Reka, T. 2003. Analysis of regulatory function of circadian clock on photoreceptor gene expression.  
498 Ph. D thesis. Biological Research Center of the Hungarian Academy Sciences, Hungary.  
499  
500 Fravolini A, Williams DG, Thompson TL (2002) Carbon isotope discrimination and bundle sheath  
501 leakiness in three C(4) subtypes grown under variable nitrogen, water and atmospheric CO(2) supply. *J*  
502 *Exp Bot* 53(378): 2261–2269.  
503  
504 Wang C, Guo L, Li Y, Wang Z (2012) Systematic comparison of c3 and c4 plants based on metabolic  
505 network analysis. *BMC Syst Biol* 2: S9.  
506  
507 Grabherr, M.G., Haas, B.J., Yassour, M., et al. 2011. Full length transcriptome assembly from  
508 RNA-Seq data without a reference genome. *Nature Biotechnology* 29: 644-652.  
509  
510 Kanehisa, M., Araki, M., Goto, S., et al. 2008. KEGG for linking genomes to life and the environment.  
511 *Nucleic Acids Research* 36 (database issue): D480-D484.  
512  
513 Tachibana M, Allen AE, Kikutani S, Endo Y, Bowler C (2011) Localization of putative carbonic  
514 anhydrases in two marine diatoms, *Phaeodactylum tricorutum* and *Thalassiosira*  
515 *pseudonana*. *Photosynth Res* 109: 205–221.  
516  
517 Ma, L., Li, J., Qu, L., Hager, J., Chen, Z., Zhao, H., Deng, X.W. 2001. Light control of *Arabidopsis*  
518 development entails coordinated regulation of genome expression and cellular pathways. *Plant Cell* 13:  
519 2589-2608.

520

521 Robinson, M.D., Oshlack, A. 2010. A scaling normalisation method for differential expression analysis  
522 of RNA-seq data. *Genome Biology* 11:R25.

523

524 Sun, L., Wang, S., Zhao, M., Fu, X., Gong, X., et al. 2009 Phycobilisomes from cyanobacteria. In:  
525 Gault, P.M., Maler, H.J. (editors) *Handbook on Cyanobacteria: Biochemistry, Biotechnology and*  
526 *Application*. New York: Nova Science Publishers. 105–160.

527

528 The UniProt Consortium. 2015. UniProt: a hub for protein information. *Nuclei Acids Research* **43**:  
529 D204-D212.

530

531 Trapnell, C., Roberts, A., Goff, L., Pertea, G., Kim, D., Kelley, D. R., et al. 2012. Differential gene and  
532 transcript expression analysis of RNA-seq experiments with TopHat and Cufflinks. *Nature Protocols* 7:  
533 562-578.

534

535 Ye, J., Ye, J., Fang, L., Zheng, H., Zheng, H., et al. 2006: WEGO: a web tool for plotting GO  
536 annotations. *Nucleic Acids Research* **34** (web server issue): W293-W297.

537

538 Yong, W.T.L., Ting, S.H., Yong, Y.S., Thien, V.Y., Wong, S.H., Chin, W.L., Rodrigues, K.F. and  
539 Anton, A. 2014. Optimization of culture conditions for the direct regeneration of *Kappaphycus*  
540 *alvarezii* (Rhodophyta, Solieriaceae). *Journal of Applied Phycology* **26**: 1597-1606.

541

542 Tonkyn, J.C., Deng, X.W., Gruissem, W. 1992. Regulation of plastid gene expression during  
543 photooxidative stress. *Plant Physiology* 99:1406-1415.

544

545 Maxwell, D.P., Laudenbach, D.E., Huner, N. 1995. Redox regulation of light-harvesting complex II  
546 and CAB mRNA abundance in *Dunaliella salina*. *Plant Physiology* 109:787-795.

547

548 Teramoto, H., Nakamori, A., Minagawa, J., T-aki Ono. 2002. Light-intensity-dependent expression of  
549 Lhc gene family encoding light-harvesting chlorophyll a/b proteins of photosystem II in  
550 *Chlamydomonas reinhardtii*. *Plant Physiology* 130:325-333.

551

552 Peters, A.F., Scornet, D., Ratin, M., Charrier, B., Monnier, A., Merrien, Y., Corre, E., Coelho, S.M.,  
553 Cock, J.M. 2008. Life-cycle-generation –specific developmental processes are modified in the  
554 immediate upright mutant of the brown alga *Ectocarpus siliculosus*. *Development* 135:1503-1512.

555

556 Hwang, Y.S., Jung, G., Jin, E. 2008. Transcriptomic analysis of acclamatory responses to thermal  
557 stress in Antarctica algae. *Biochem Biophys Res Comm* 367:635-641.

558

559 Dittami, S.M., Scornet, D., Petit, J.L., Ségurens, B, Da Silva C, Corre E, Dondrup M, Glatting K-H,  
560 König R, Sterck L, *et al.* 2009. Global expression analysis of the brown alga *Ectocarpus*  
561 *siliculosus* (Phaeophyceae) reveals large-scale reprogramming of the transcriptome in response to  
562 abiotic stress. *Genome boil* 10:R66.

563

564 Pearson GA, Hoarau G, Lago-Leston A, Coyer James A, Kube M, Reinhardt R, Henckel K, Serrão  
565 ETA, Corre E, Olsen JL: An expressed sequence tag analysis of the intertidal brown seaweeds *Fucus*  
566 *serratus* (L.) and *F. vesiculosus* (L.) (Heterokontophyta, Phaeophyceae) in response to abiotic  
567 stressors. *Mar Biotechnol* 2010, **12**:195–213.

568

569 Savard F, Richard C, Guertin M: The *Chlamydomonas reinhardtii* LI818 gene represents a distant  
570 relative of the cabI/II genes that is regulated during the cell cycle and in response to illumination. *Plant*  
571 *Mol Biol* 1996, **32**:461–473.

572



573 Miura K, Yamano T, Yoshioka S, Kohinata T, Inoue Y, Taniguchi F, Asamizu E, Nakamura Y, Tabata  
574 SY, Katsuyuki T, *et al.*: Expression profiling-based identification of CO<sub>2</sub>-responsive genes regulated  
575 by CCM1 controlling a carbon-concentrating mechanism in *Chlamydomonas reinhardtii*. *Plant*  
576 *Physiol* 2004, **135**:1595–1607.

577

578 Green BR, Kühlbrandt W: Sequence conservation of light-harvesting and stress-response proteins in  
579 relation to the three-dimensional molecular structure of LHCII. *Photosynth Res* 1995, **44**:139–148.

580

581 Caron L, Douady D, de Martino A, Quinet M: Light harvesting in brown algae. *Cah Biol*  
582 *Mar* 2001, **42**:109–124.

583

584 Dring, M.J. 1981. Chromatic adaptation of photosynthesis in benthic marine algae: an examination of  
585 its ecological significance using a theoretical model. *Limnol Oceanography* 26:271-284.

586

587 Lobban C.S. & Harrison P.J. (1994) *Seaweed ecology and physiology*. Cambridge University Press,  
588 Cambridge.

589

590 Sagert, S., Forster, R.M., Feuerpfeil, P., Schubert, H. 1997. Daily course of photosynthesis and  
591 photoinhibition in *Chondrus crispus* (Rhodophyta) from different shore levels. *European Journal of*  
592 *Phycology* 32:363-371.

593

594 Deng, Y., Yao, J., Wang, X., Guo, H. & Duan, D. 2012. Transcriptome sequencing and comparative  
595 analysis of *Saccharina japonica* (Laminariales, Phaeophyceae) under blue light induction. *PLoS ONE*  
596 7:e39704.

597

598 Wang, W.J., Wang, F.J., Sun, X.T., Liu, F.L. & Liang, Z.R. 2013. Comparison of transcriptome under  
599 red and blue light culture of *Saccharina japonica* (Phaeophyceae). *Planta* 237:1123-1133.

600

601 Wu, S.X., Sun, J., Chi, S., Wang, L., Wang, X.M., Liu, C., Li, X., Yin, L., Liu, T., Yu, J. 2014.

602 Transcriptome sequencing of essential marine brown and red algal species in China and its significance

603 in algal biology and phylogeny. *Acta Oceanologica Sinica* 33:1-12.

604

605 Song, L., Wu, S.X., Sun, J., Wang, L., Liu, T., Chi, S., Liu, C., Li, X., Yin, L., Wang, X., Yu, J. 2014.

606 De novo sequencing and comparative analysis of three red algal species of family Solieriaceae to

607 discover putative genes associated with carrageenan biosynthesis. *Acta Oceanologica Sinica* 33:45-53.

608

609 Zhen Zhang, Tong Pang, Qianqian Li, Litao Zhang, Ling Li & Jianguo Liu (2015) Transcriptome

610 sequencing and characterization for *Kappaphycus alvarezii*, *European Journal of Phycology*, 50:4,

611 400-407

612

613 Lobanov, A., Fomenko, D., Zhang, Y., Sengupta, A., Hatfield, D. & Gladyshev, V. (2007).

614 Evolutionary dynamics of eukaryotic selenoproteomes: large selenoproteomes may associate with

615 aquatic life and small with terrestrial life. *Genome Biology*, 8:1 –16.

616

617 Tsuji Y, Suzuki I, Shiraiwa Y (2009) Photosynthetic carbon assimilation in the

618 coccolithophorid *Emiliana huxleyi* (Haptophyta): evidence for the predominant operation of the

619 C<sub>3</sub> cycle and the contribution of  $\beta$ -carboxylases to the active anaplerotic reaction. *Plant Cell Physiol*

620 50: 318–329.

621

622 Beer S, Israel A (1986) Photosynthesis of *Ulva* sp. III. O<sub>2</sub> effects, carboxylase activities, and the

623 CO<sub>2</sub> incorporation pattern. *Plant Physiol* 81: 937–938.

624

625 Derelle E, Ferraz C, Rombauts S, Rouze P, Worden AZ, et al. (2006) Genome analysis of the  
626 smallest free-living eukaryote *Ostreococcus tauri* unveils many unique features. Proc Natl Acad Sci  
627 USA 103: 11647–11652.  
628  
629 Leliaert F, Smith DR, Moreau H, Herron MD, Verbruggen H, et al. (2012) Phylogeny and molecular  
630 evolution of the green algae. Crit Rev Plant Sci 31: 1–46.  
631  
632 Xu, J., Fan, X, Zhang, X., Xu, D., Mou, S., Cao, S., Zheng, Z, Miao, J., Ye, N. 2012. Evidence of  
633 coexistence of C3 and C4 photosynthetic pathways in green-tide-forming alga, *Ulva prolifera*. PLoS  
634 ONE 7(5):e37438.  
635  
636 Keeley, J.E. 1999. Photosynthetic pathway diversity in a seasonal pool community. Funct Ecol  
637 13:106-118.  
638  
639 Ehleringer, J.R., Cerling, T.E., Helliker, B.R. 1997. C4 photosynthesis, atmospheric CO2 and climate.  
640 Oecologia 112:285-299.  
641  
642 Reiskind, J.B., Madsen, T.V., Vanginkel, L.C., Bowes, G. 1997. Evidence that inducible C4 type  
643 photosynthesis is a chloroplastic CO2-concentrating mechanism in *Hydrilla*, a submersed monocot.  
644 Plant, Cell and Environment 20:211-220.  
645  
646 Perteau, G., Huang, X., Liang, F., Antonescu, V., Sultana, R., Karamycheva, S., et al. 2003. TIGR  
647 Gene Indices clustering tool (TGICL): a software system for fast clustering of large EST datasets.  
648 Bioinformatics 19:651-652.  
649  
650 Li B, Dewey CN (2011) RSEM: accurate transcript quantification from RNA-Seq data with or without  
651 a reference genome. BMC Bioinformatics 12: 1–16. doi: 10.1186/1471-2105-12-323

652

653 Sturm, S., Engelken, J., Gruber, A., Vugrinec, S., Kroth, P.G, Adamska, I., Lavaud, J. 2013. A novel  
654 type of light-harvesting antenna protein of red algal origin in algae with secondary plastids. BMC  
655 Evolutionary Biology 13:159.

656

657 Gantt, E., Grabowski, B., Cunningham Jr., F.X. 2003. Antenna systems of red algae: phycobilisomes  
658 with photosystem II and chlorophyll complexes with photosystem I. In Green, B.R., Parson, W.W.  
659 (editors). Light harvesting antennas in photosynthesis. Springer Netherlands.

660

661 F. Lopez-Figueroa and X. Niell, Effects of light quality of chlorophyll and biliprotein accumulation  
662 on seaweeds, *Mar. Biol.*, 104 (1990) 321-327.

663

664 Godinez-Ortega, J.L., Snoeijs, P., Freile-Pelegrin, Y., Pedersen, M. 2008. Growth and pigment  
665 composition in the red alga *Halymenia floresii* cultured under different light qualities. Journal of  
666 Applied Phycology 20:253-260.

667

668 Talarico L, Cortese A (1993) Response of *Audouinella-saviana* (Meneghini) Woelkerling  
669 (Nemaliales, Rhodophyta) cultures to monochromatic light. *Hydrobiologia* 261:477–484

670

671 Franklin LA, Krâbs G, Kuhlenkamp R (2002) Blue light and UVradiation control the synthesis of  
672 mycosporine-like amino acids in *Chondrus crispus* (Florideophyceae). *J Phycol* 37:257–270.

673

674 Zou D (2005) Effects of elevated atmospheric CO2 on growth, photosynthesis and nitrogen  
675 metabolism in the economic brown seaweed, *Hizikia fusiforme* (Sargassaceae, Phaeophyta).  
676 *Aquaculture* 250:726–735

677

- 678 Israel A, Hophy M (2002) Growth, photosynthetic properties and Rubisco activities and amounts of  
679 marine macroalgae grown under current and elevated seawater CO<sub>2</sub> concentrations. *Glob Chang Biol*  
680 8:831–840  
681
- 682 Garcia-Sanchez MJ, Fernandez JA, Niell FX (1994) Effect of inorganic carbon supply on the  
683 photosynthetic physiology of *Gracilaria tenuistipitata*. *Planta* 194:55–61  
684
- 685 Gao K, Aruga Y, Asada K, Ishihara T, Akano T, Kiyohara M (1991) Enhanced growth of the red alga  
686 *Porphyra yezoensis* Ueda in high CO<sub>2</sub> concentrations. *J Appl Phycol* 3:355–362  
687
- 688 Gao K, Aruga Y, Asada K, Kiyohara M (1993) Influence of enhanced CO<sub>2</sub> on growth and  
689 photosynthesis of the red algae *Gracilaria* sp. and *Gracilaria chilensis*. *J Appl Phycol* 5:563–571.  
690
- 691 Kaneko T., Tanaka A., Sato S., Kotani H., Sazuka T., Miyajima N., Sugiura M., Tabata S. 1995.  
692 Sequence analysis of the genome of the unicellular cyanobacterium *Synechocystis* sp. strain PCC6803.  
693 I. Sequence features in the 1 Mb region from map positions 64% to 92% of the genome. *DNA Res*  
694 2:153-166.
